# Supplementary material for: From pixels to phenotypes: Integrating image-based profiling with cell health data as BioMorph features improves interpretability
Source: PubMed Central journal article supplement (PMC10916876; doi:10.1091/mbc.e23-08-0298), 2024-02-02
Supplement: mbc-35-mr2-s001.pdf [file mbc-35-mr2-s001.pdf]

# Supplemental Materials

*Molecular Biology of the Cell*

Seal *et al.*

## Supplementary Information

# From Pixels to Phenotypes: Integrating Image-Based Profiling with Cell Health Data Improves Interpretability

*Srijit Seal<sup>1,2</sup>, Jordi Carreras-Puigvert<sup>3</sup>, Shantanu Singh<sup>1</sup>, Anne E Carpenter<sup>1</sup>, Ola Spjuth<sup>\*3</sup>, Andreas Bender<sup>\*2</sup>*

<sup>1</sup>Imaging Platform, Broad Institute of MIT and Harvard, Cambridge MA, USA

<sup>2</sup>Yusuf Hamied Department of Chemistry, University of Cambridge, Cambridge, United Kingdom

<sup>3</sup>Department of Pharmaceutical Biosciences and Science for Life Laboratory, Uppsala University, Uppsala, Sweden

Cell Painting; Cell Health; BioMorph, Toxicity Prediction; Cell Morphology; Interpretability; Image-based profiling

\* Email: [ola.spjuth@farmbio.uu.se](mailto:ola.spjuth@farmbio.uu.se), [ab454@cam.ac.uk](mailto:ab454@cam.ac.uk)

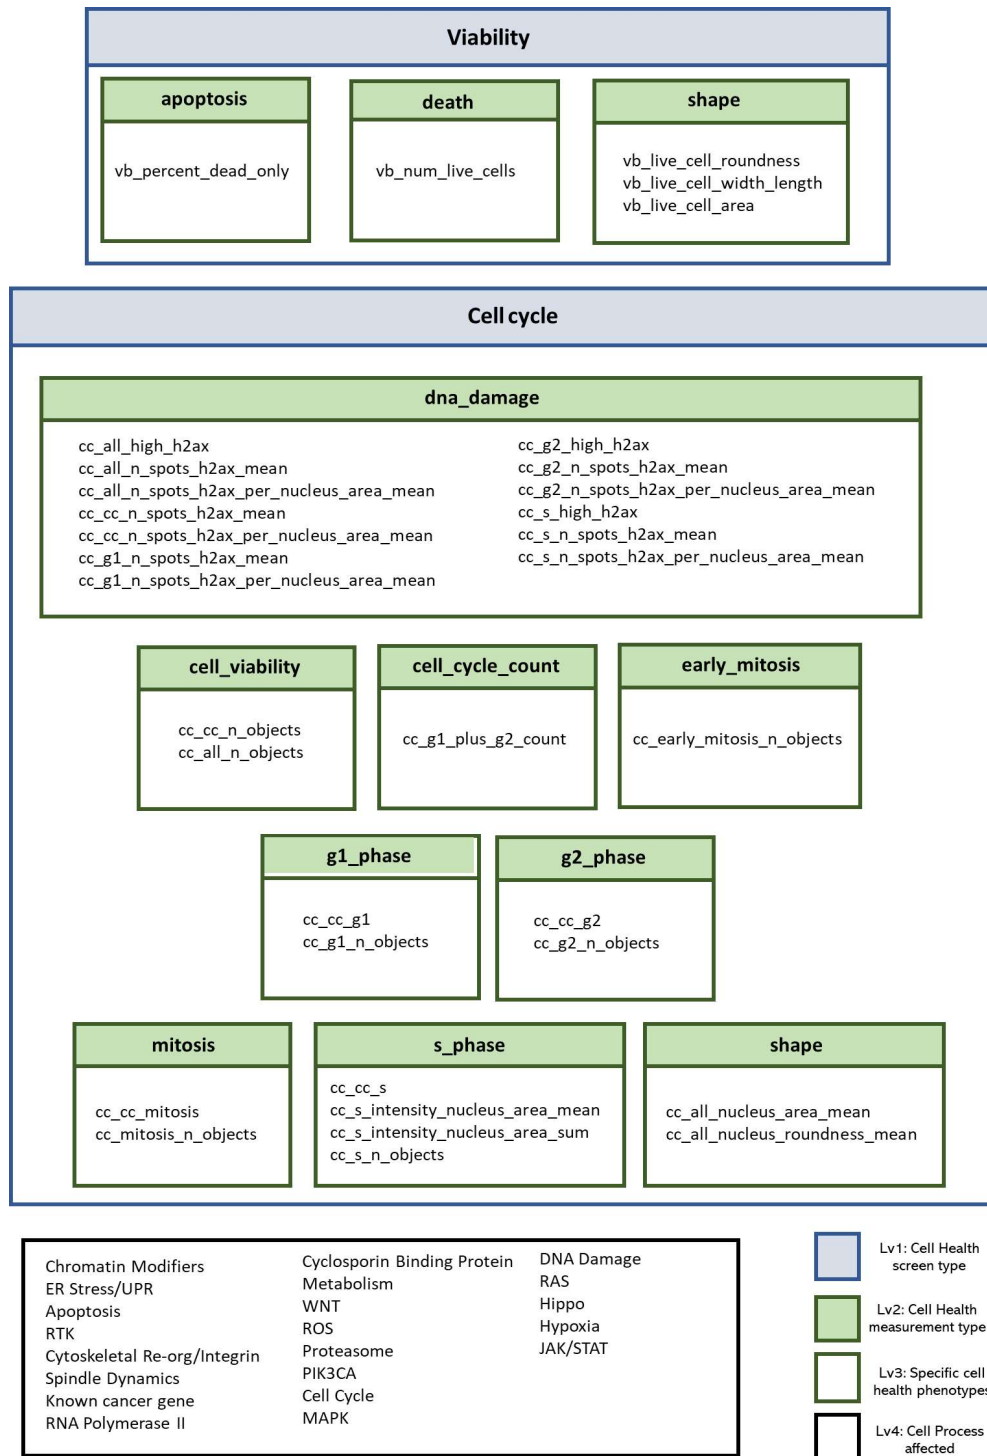

**Figure S1:** BioMorph terms' hierarchy with relationships for (a) Level 1: Cell Health assay type, (b) Level 2: Cell Health measurement type, (c) Level 3: Specific Cell Health phenotypes, (d) Level 4: Cell process affected (representative of morphological characteristics)



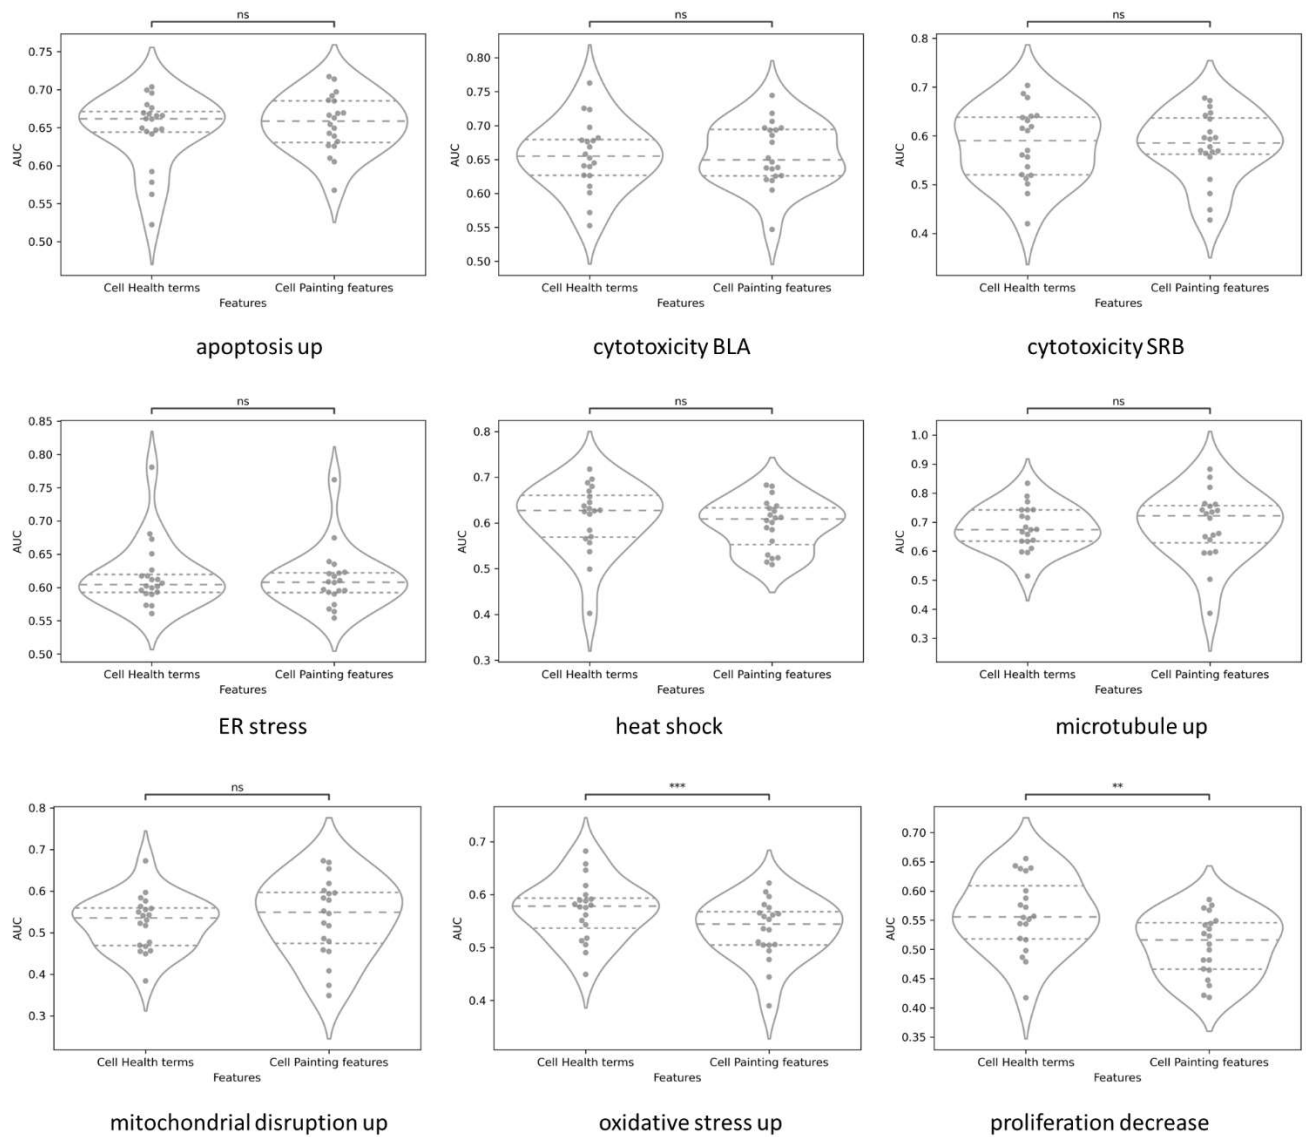

p-value annotation legend:  
 ns:  $p \leq 1.00e+00$   
 \*:  $1.00e-02 < p \leq 5.00e-02$   
 \*\*:  $1.00e-03 < p \leq 1.00e-02$   
 \*\*\*:  $1.00e-04 < p \leq 1.00e-03$   
 \*\*\*\*:  $p \leq 1.00e-04$

Figure S2: Distribution AUC for both models, namely, Cell Painting features and BioMorph terms as features when predicting 9 different broad biological activities in 5 times repeated 4-fold nested cross-validation.
